# Supplementary material for: Manganese(iii)-mediated radical cyclisations for the (Z)-selective synthesis of exo-alkylidene pyrrolidinones and pyrrolidines
Source: Royal Society of Chemistry journal article supplement (doi:10.1039/c2cc32382f), 2012-01-01

## 5. NMR spectra of the cyclisation reactions

### Diethyl 1-benzyl-3-methylene-5-oxopyrrolidine-2,2-dicarboxylate **8a**

$^1\text{H-NMR}$  (400 MHz,  $\text{CDCl}_3$ ):

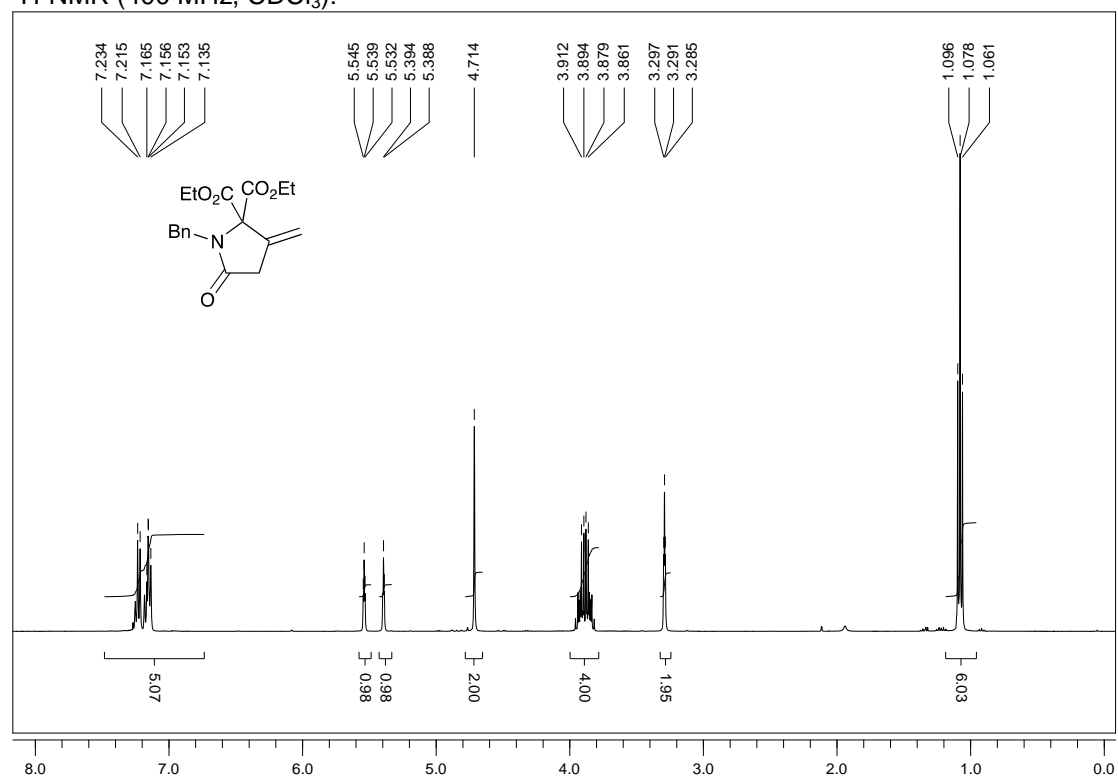

$^{13}\text{C-NMR}$  (100 MHz,  $\text{CDCl}_3$ ):

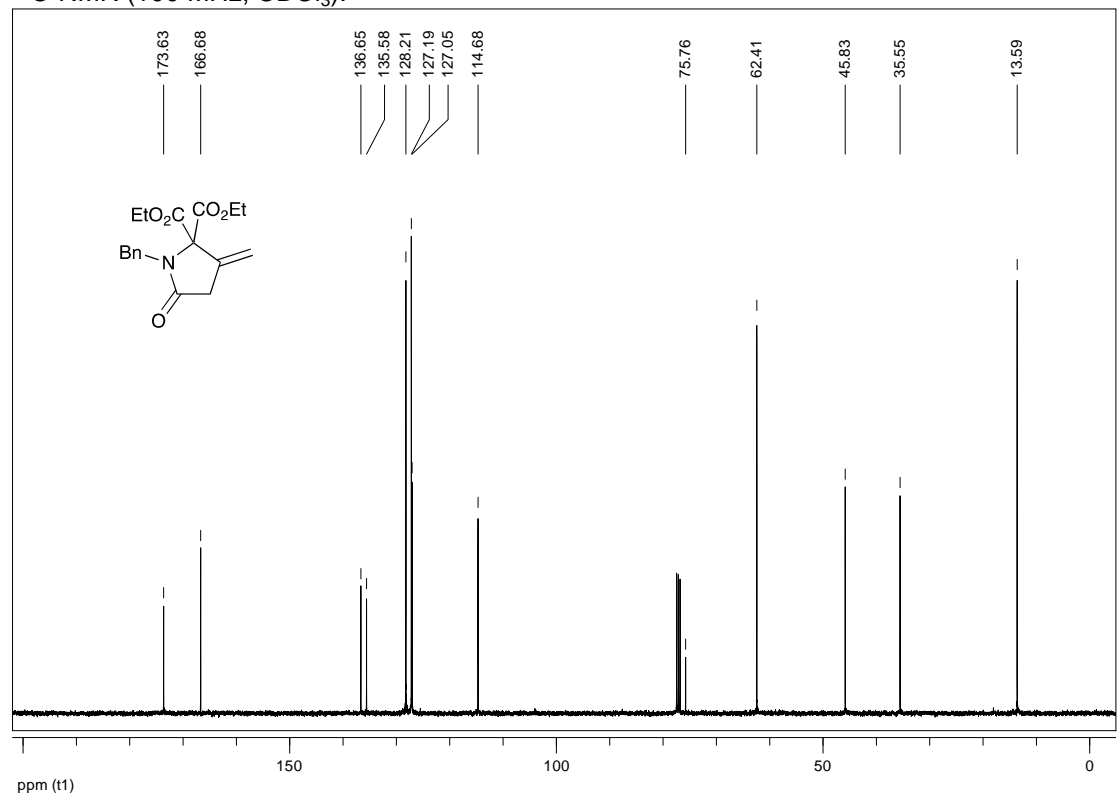

### Diethyl 1-methyl-3-methylene-5-oxopyrrolidine-2,2-dicarboxylate 8b

$^1\text{H-NMR}$  (400 MHz,  $\text{CDCl}_3$ ):

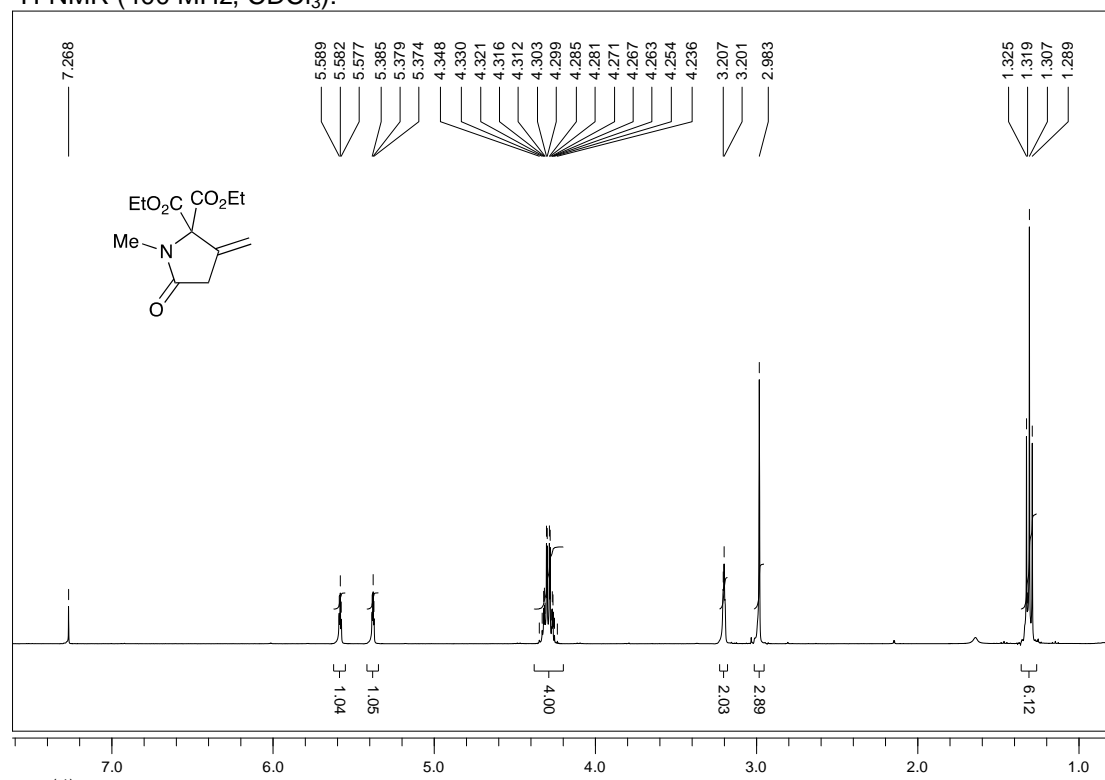

$^{13}\text{C-NMR}$  (100 MHz,  $\text{CDCl}_3$ ):

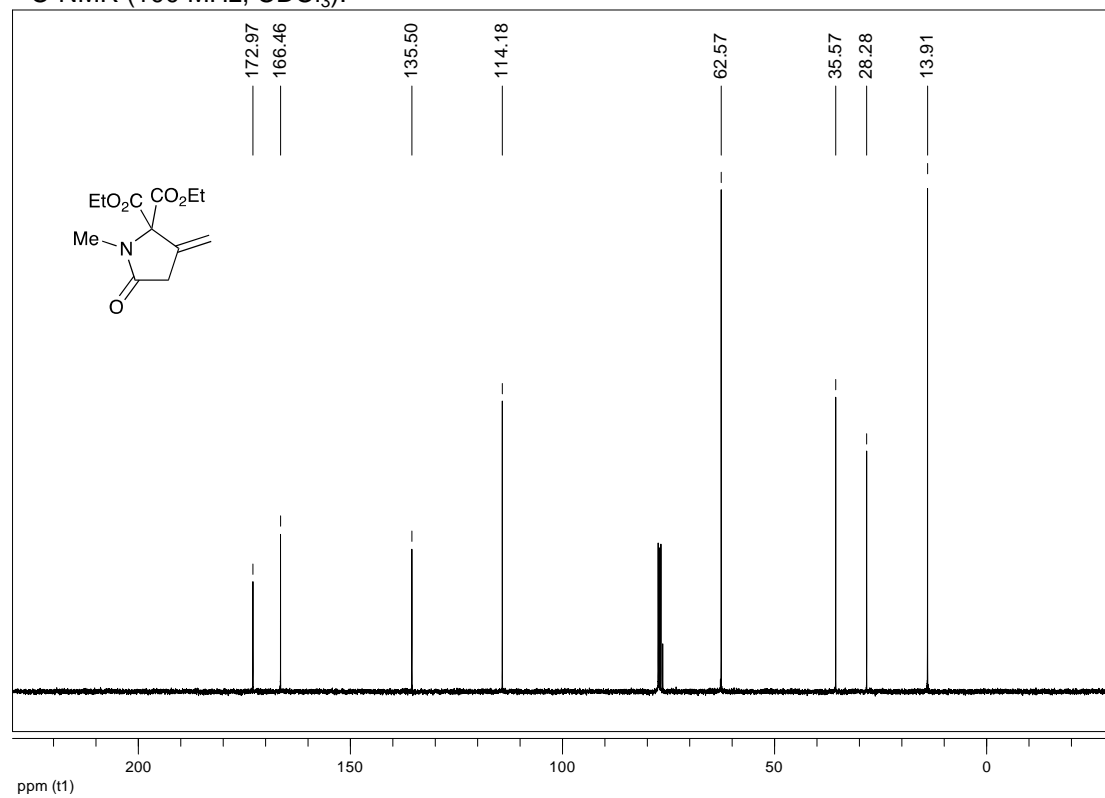

**Diethyl 3-ethylidene-1-methyl-5-oxopyrrolidine-2,2-dicarboxylate 10a – 3.8:1 Z:E  
mixture of diastereomers**

<sup>1</sup>H-NMR (500 MHz, CDCl<sub>3</sub>):

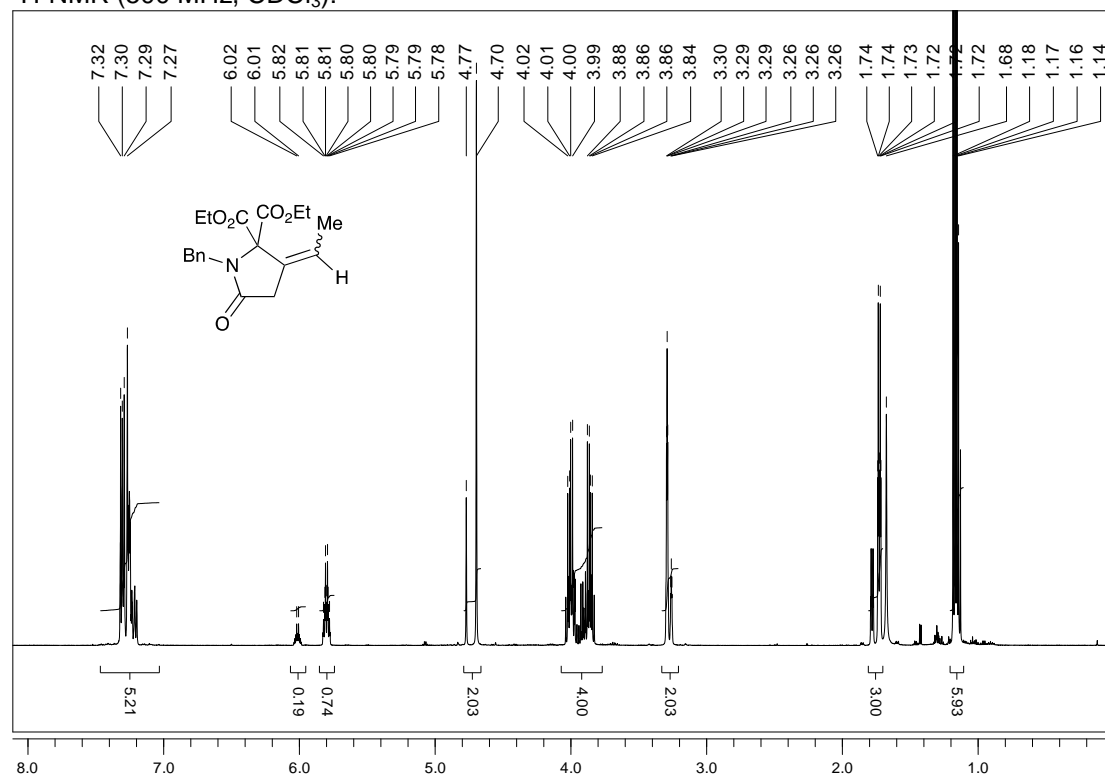

<sup>13</sup>C-NMR (125 MHz, CDCl<sub>3</sub>):

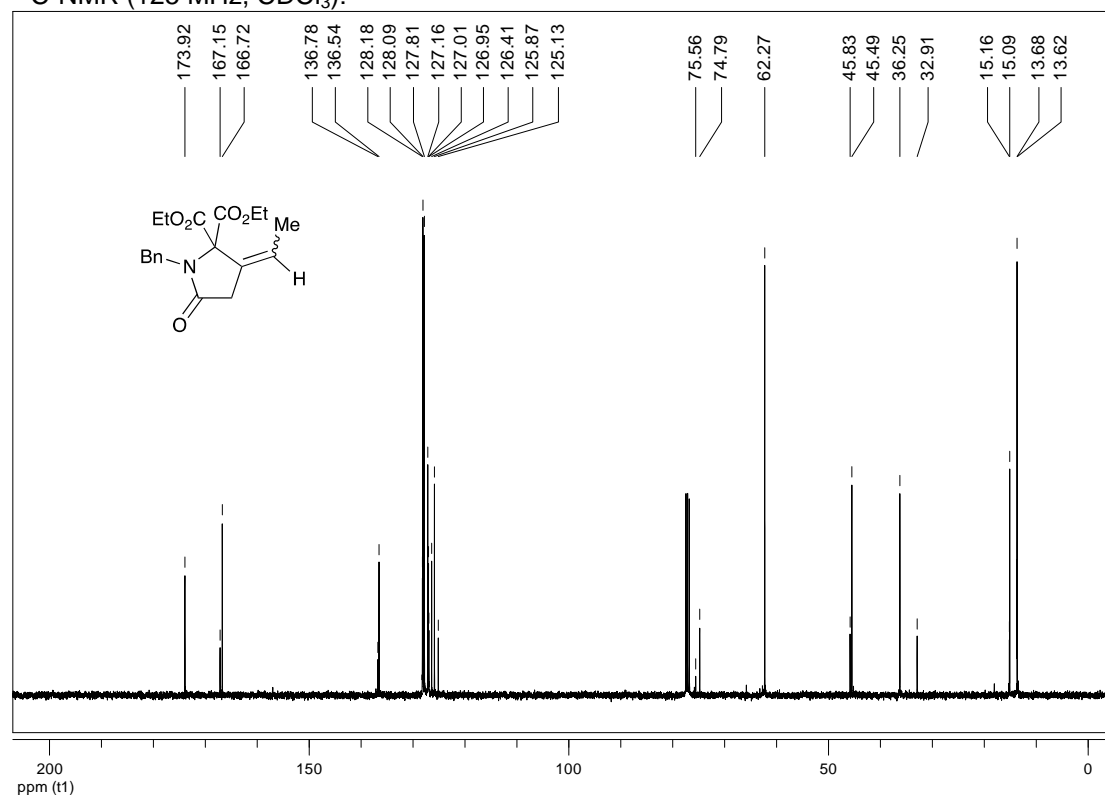

**Diethyl 1-benzyl-5-oxo-3-propylidenepyrrolidine-2,2-dicarboxylate 10b – 4.7:1 Z:E  
mixture of diastereomers**

<sup>1</sup>H-NMR (400 MHz, CDCl<sub>3</sub>):

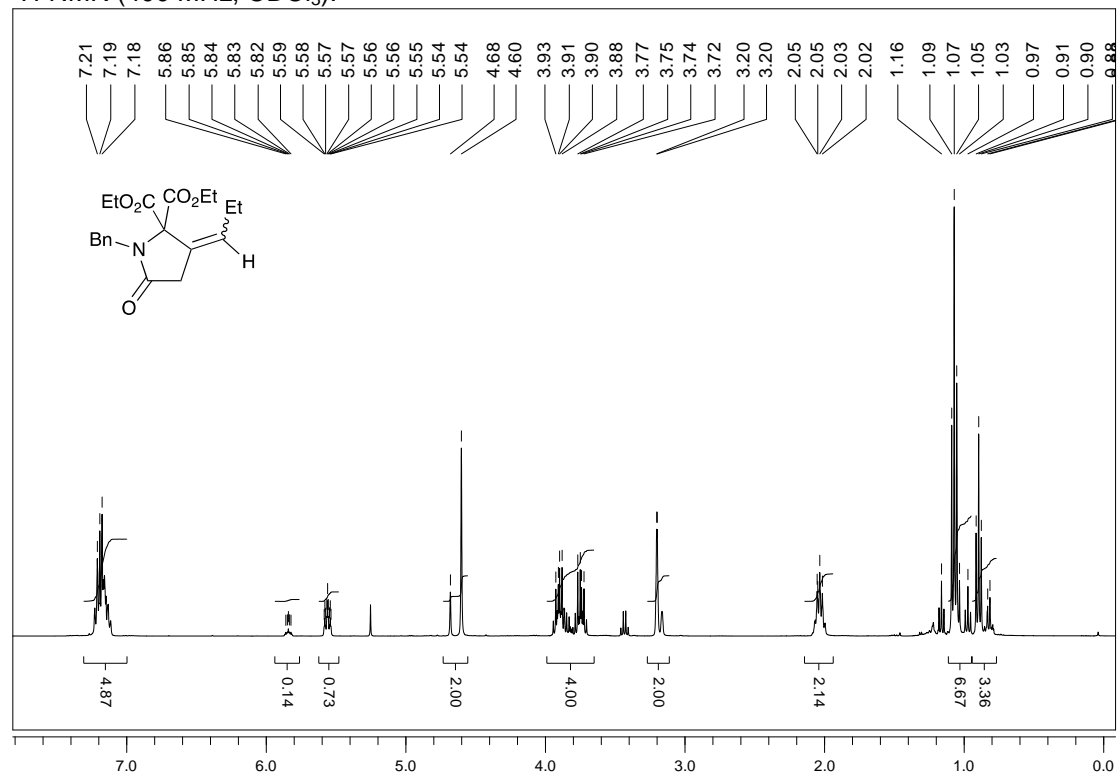

<sup>13</sup>C-NMR (100 MHz, CDCl<sub>3</sub>):

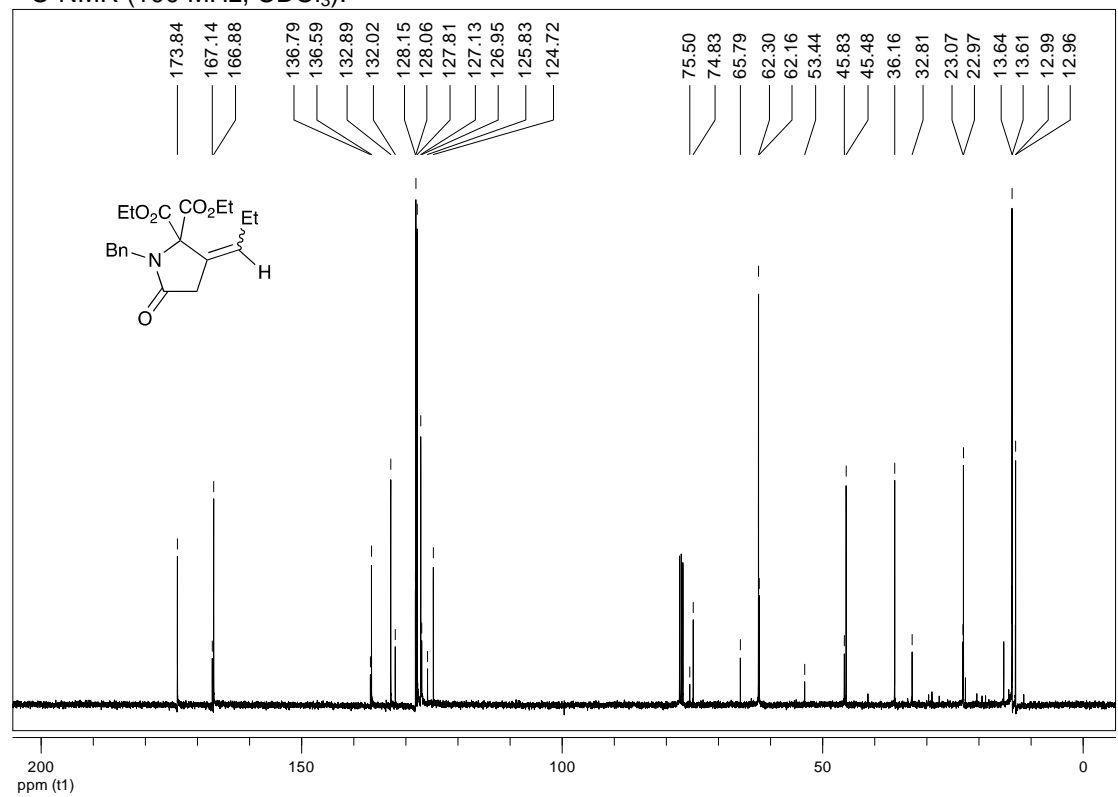

**Diethyl 1-benzyl-5-oxo-3-butylidenepyrrolidine-2,2-dicarboxylate 10c – 2.9:1 Z:E  
mixture of diastereomers**

<sup>1</sup>H-NMR (400 MHz, CDCl<sub>3</sub>):

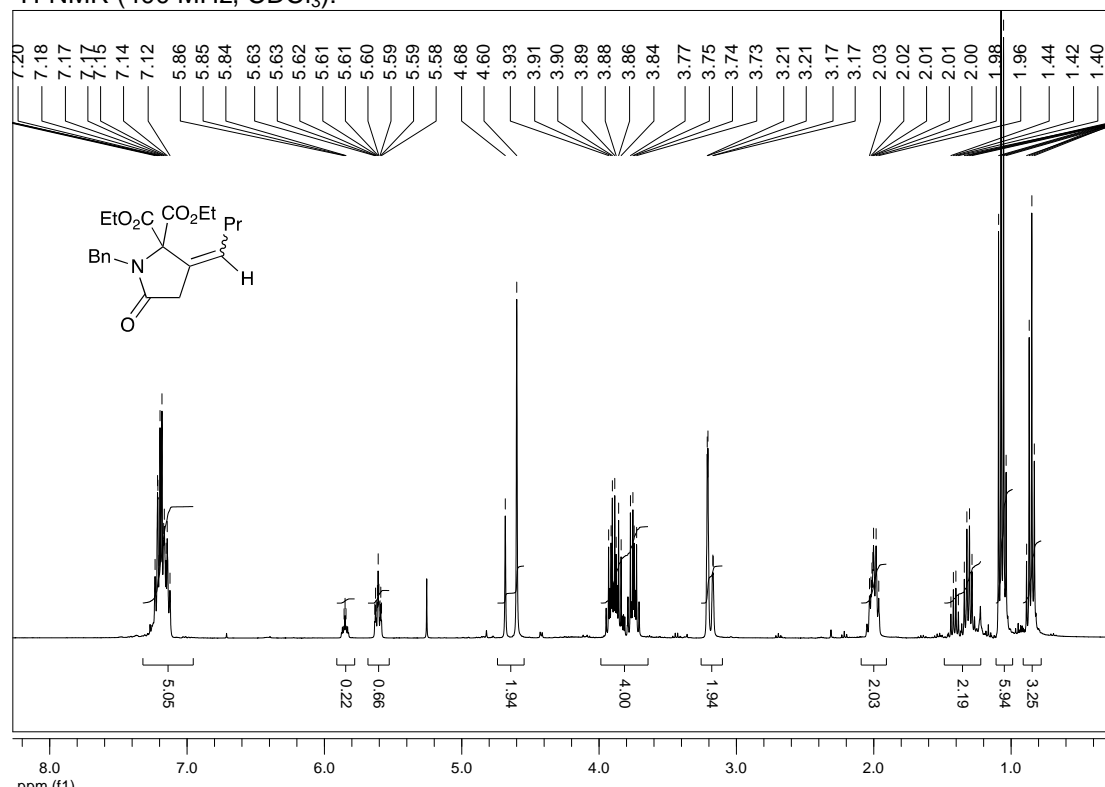

<sup>13</sup>C-NMR (100 MHz, CDCl<sub>3</sub>):

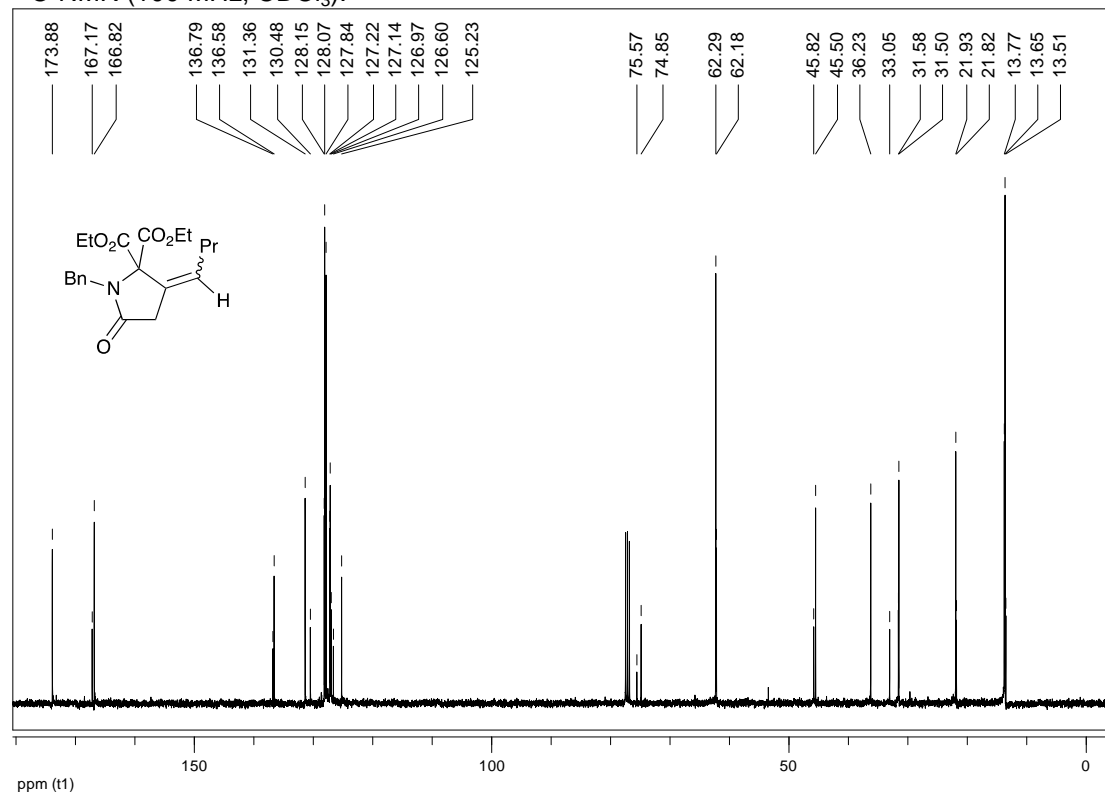

**Diethyl 1-benzyl-5-oxo-3-pentylidenepyrrolidine-2,2-dicarboxylate 10d – 3.0:1 Z:E  
mixture of diastereomers**

<sup>1</sup>H-NMR (400 MHz, CDCl<sub>3</sub>):

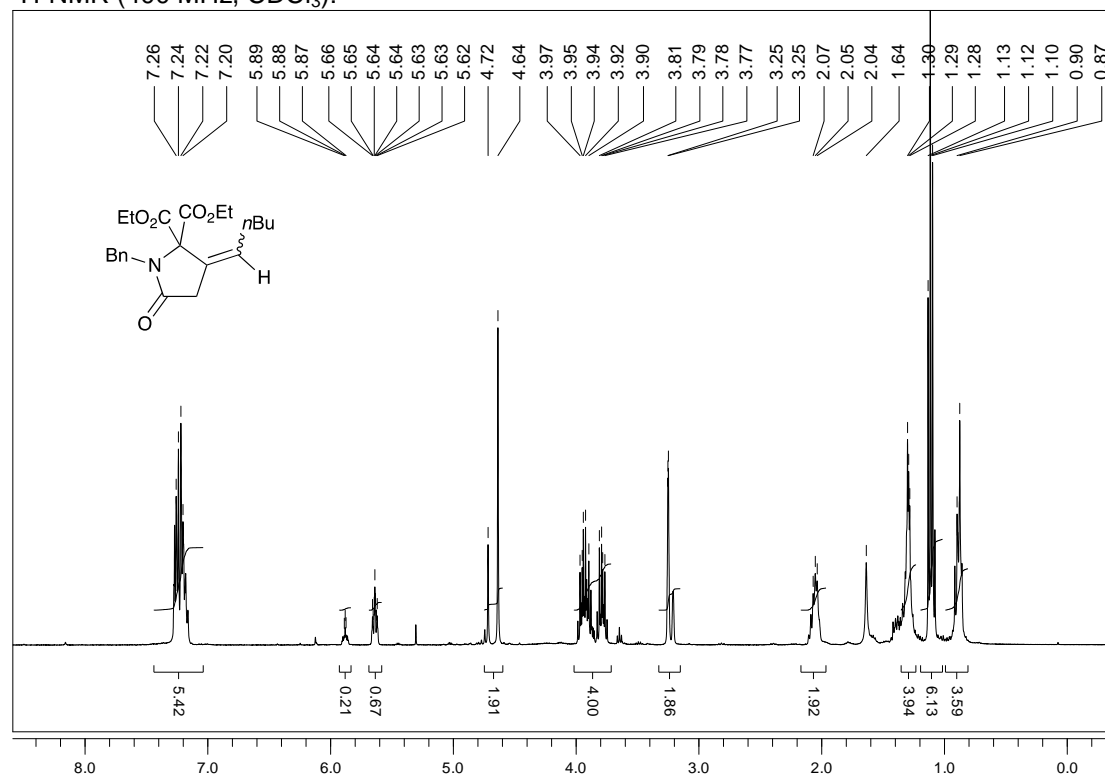

<sup>13</sup>C-NMR (100 MHz, CDCl<sub>3</sub>):

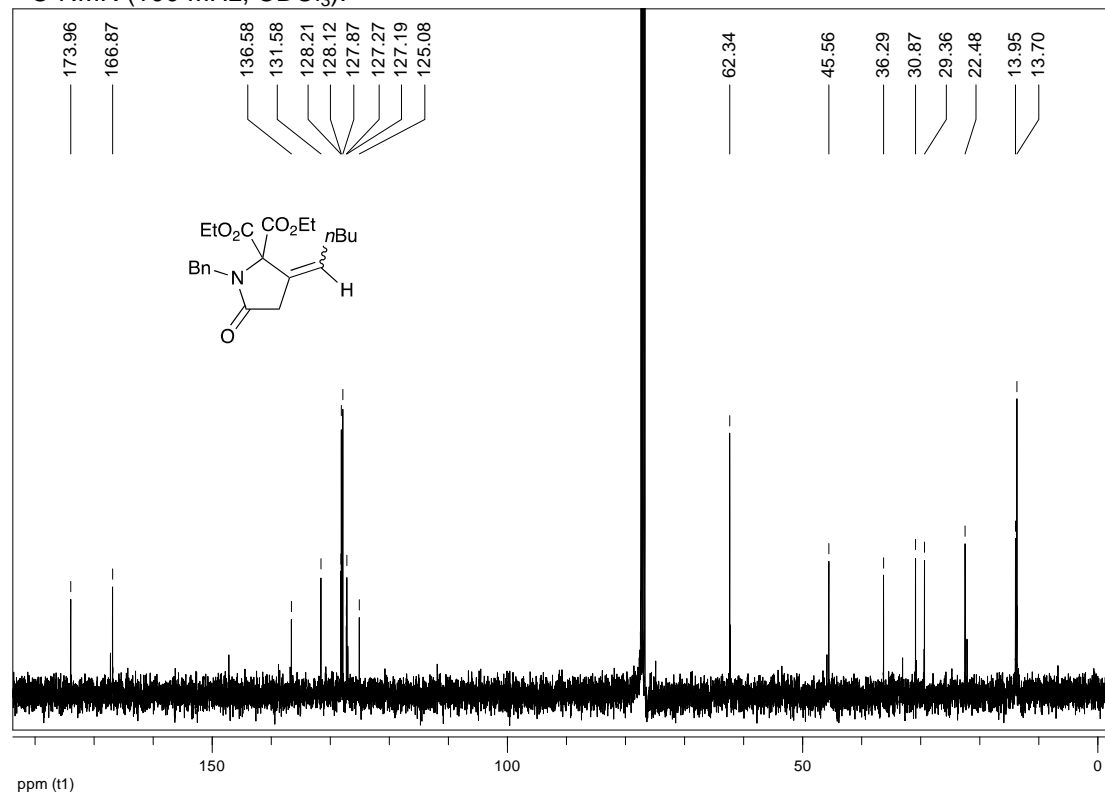

**Diethyl 1-benzyl-3-benzylidene-5-oxopyrrolidine-2,2-dicarboxylate 10e – 3.0:1 Z:E  
mixture of diastereomers**

<sup>1</sup>H-NMR (400 MHz, CDCl<sub>3</sub>):

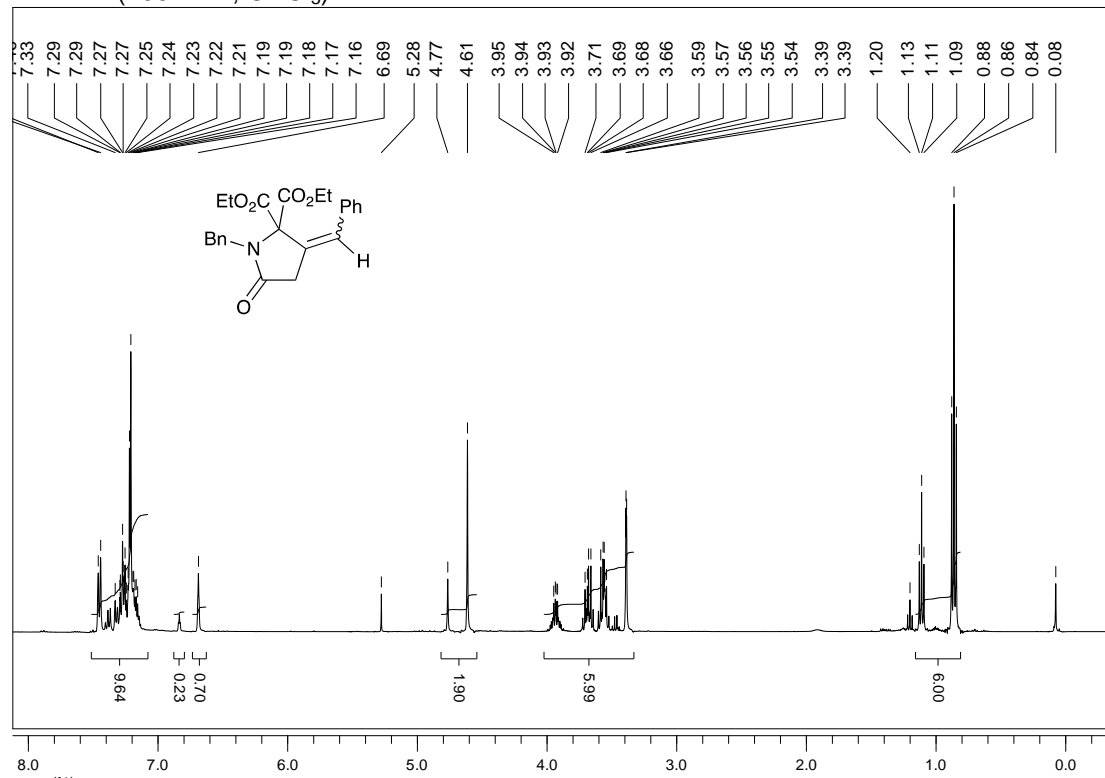

<sup>13</sup>C-NMR (100 MHz, CDCl<sub>3</sub>):

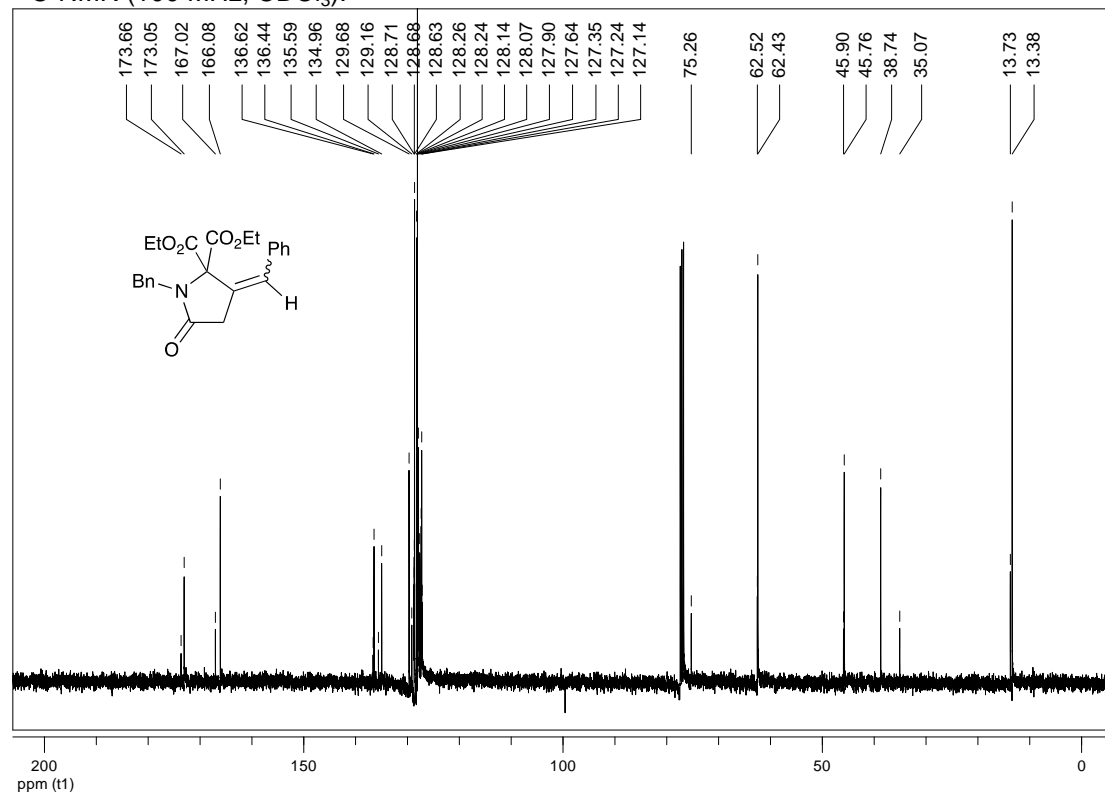

**Dibenzyl 1-benzyl-5-oxo-3-pentylidenepyrrolidine-2,2-dicarboxylate 12 – 3.5:1 Z:E  
mixture of diastereomers**

<sup>1</sup>H-NMR (400 MHz, CDCl<sub>3</sub>):

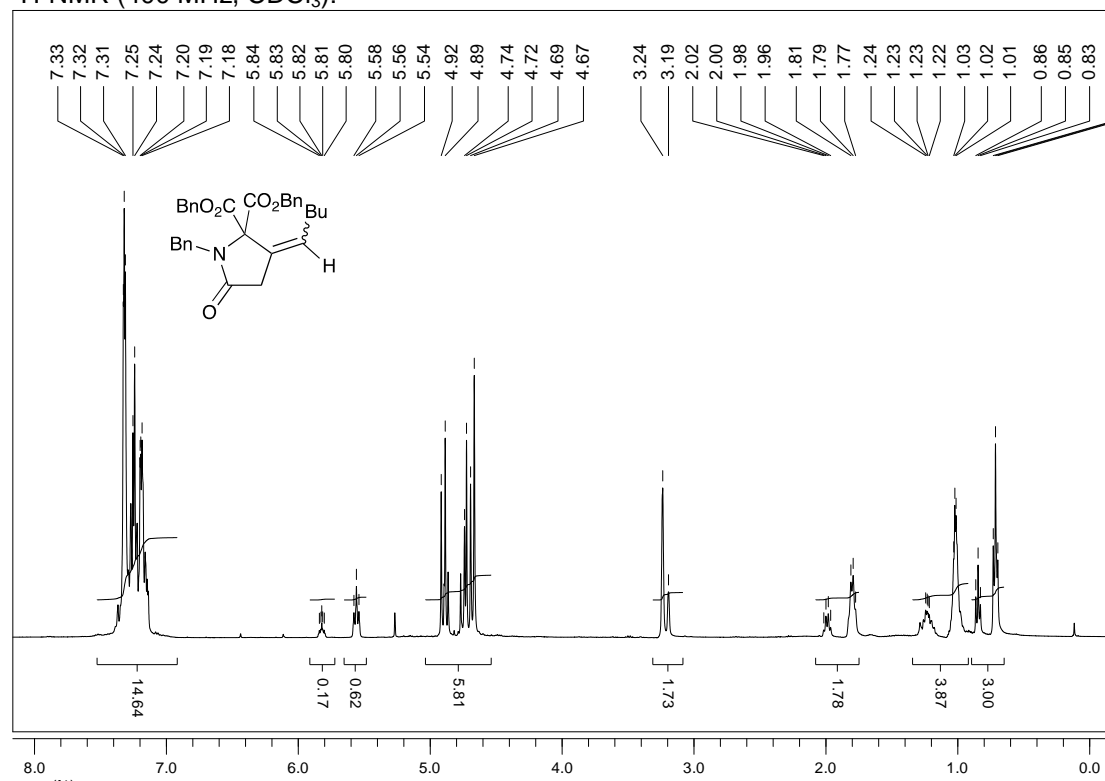

<sup>13</sup>C-NMR (100 MHz, CDCl<sub>3</sub>):

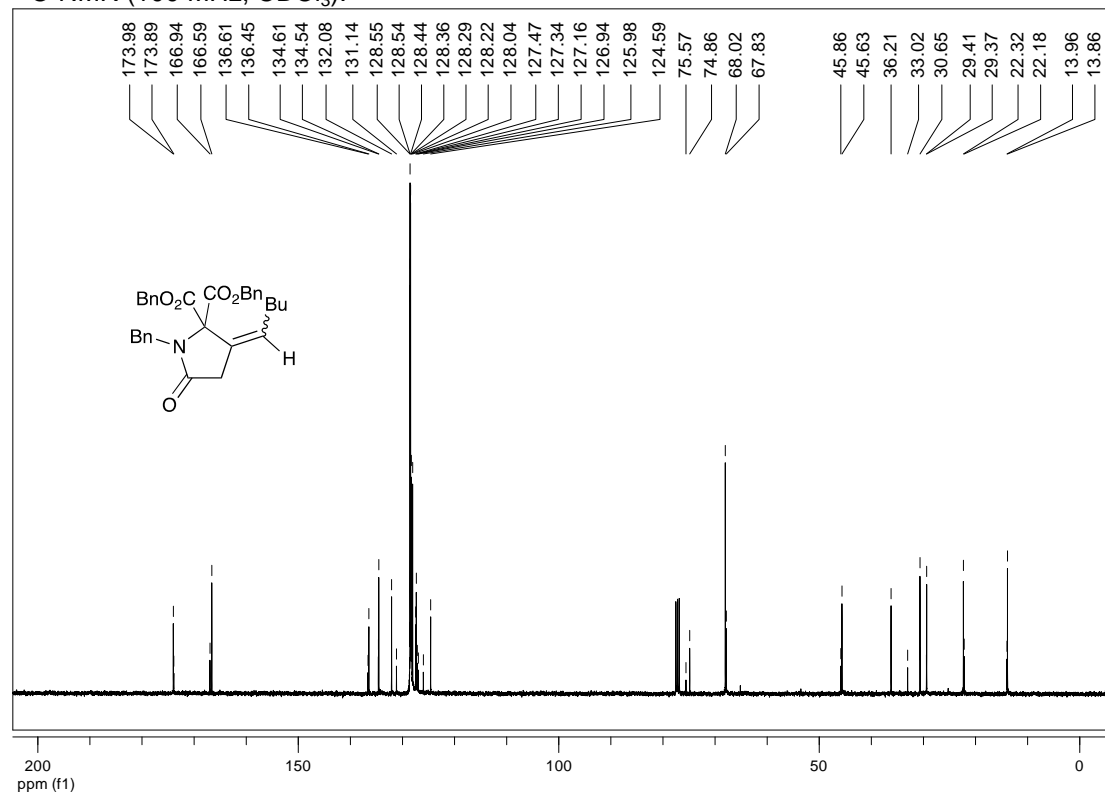



### Di-*tert*-butyl 1-benzyl-5-oxo-3-pentylidenepyrrolidine-2,2-dicarboxylate **14**

$^1\text{H-NMR}$  (400 MHz,  $\text{CDCl}_3$ ):

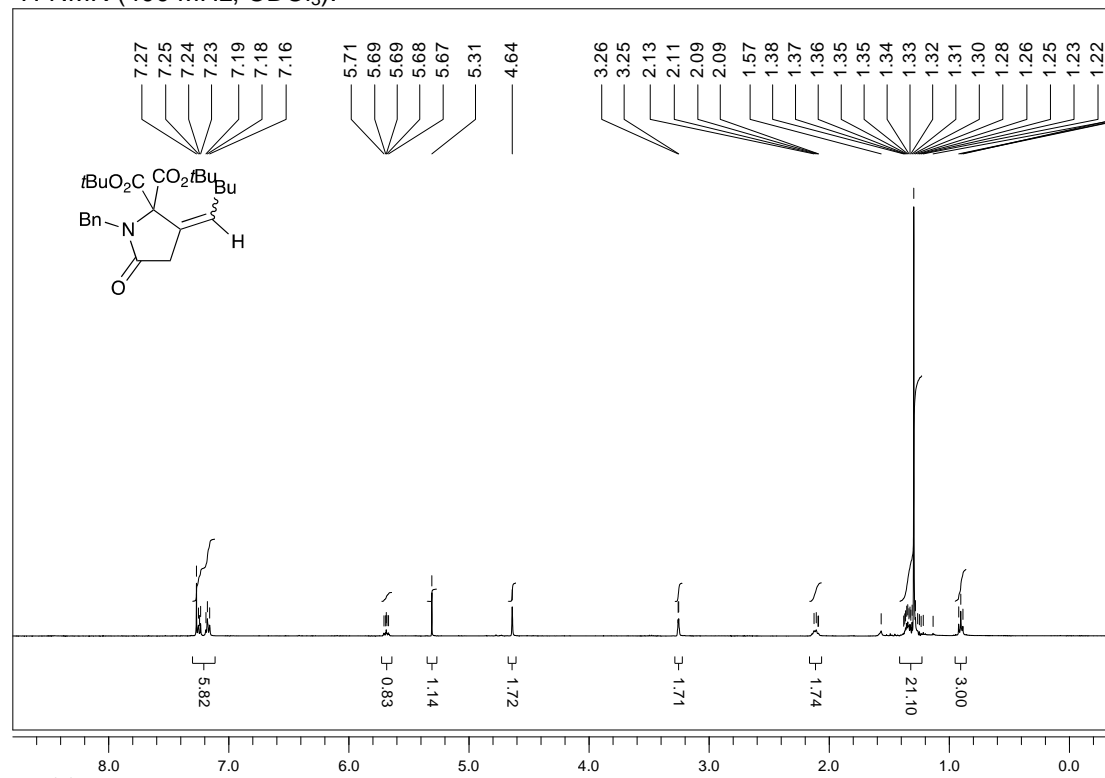

$^{13}\text{C-NMR}$  (100 MHz,  $\text{CDCl}_3$ ):

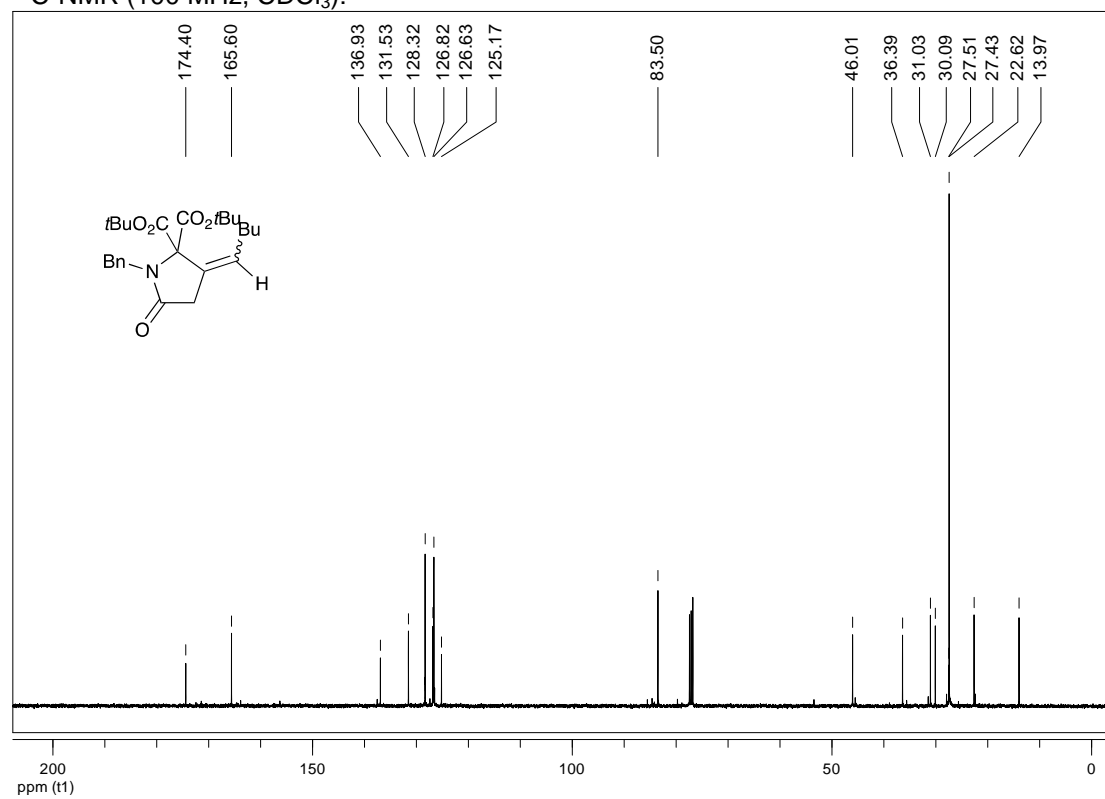

**1-Benzyl 2,2-diethyl 3-methylenepyrrolidine-1,2,2-tricarboxylate 16a – mixture of rotamers**

<sup>1</sup>H-NMR (400 MHz, CDCl<sub>3</sub>):

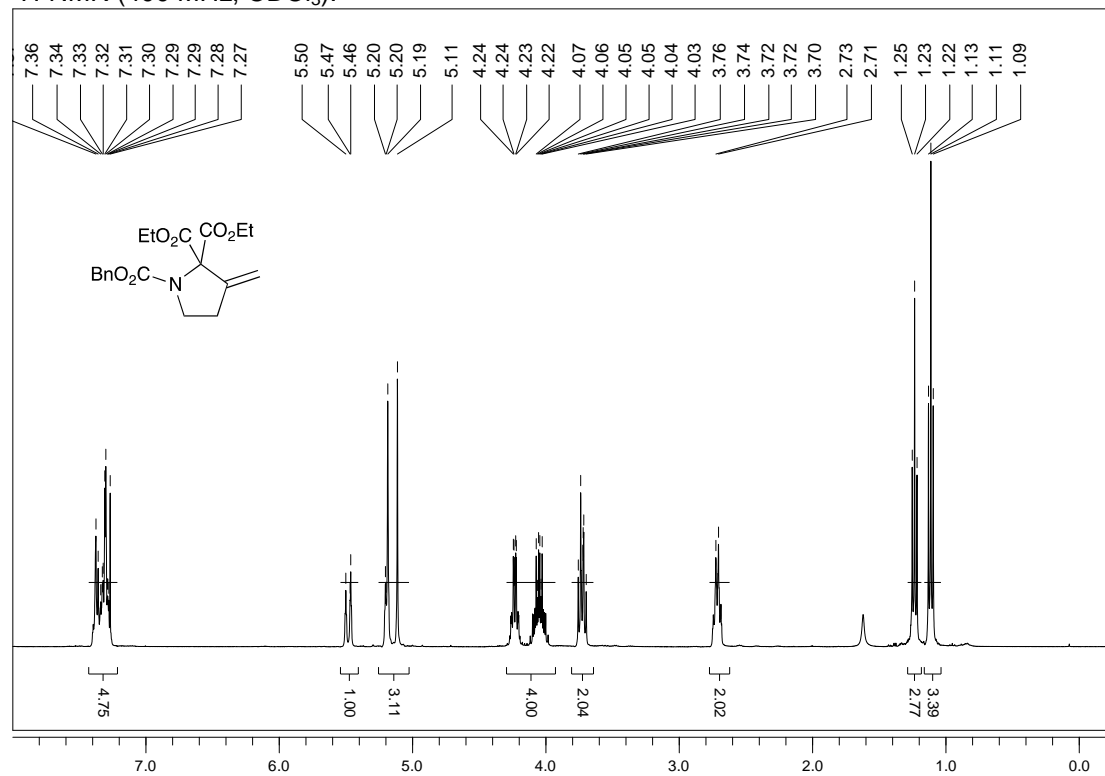

<sup>13</sup>C-NMR (100 MHz, CDCl<sub>3</sub>):

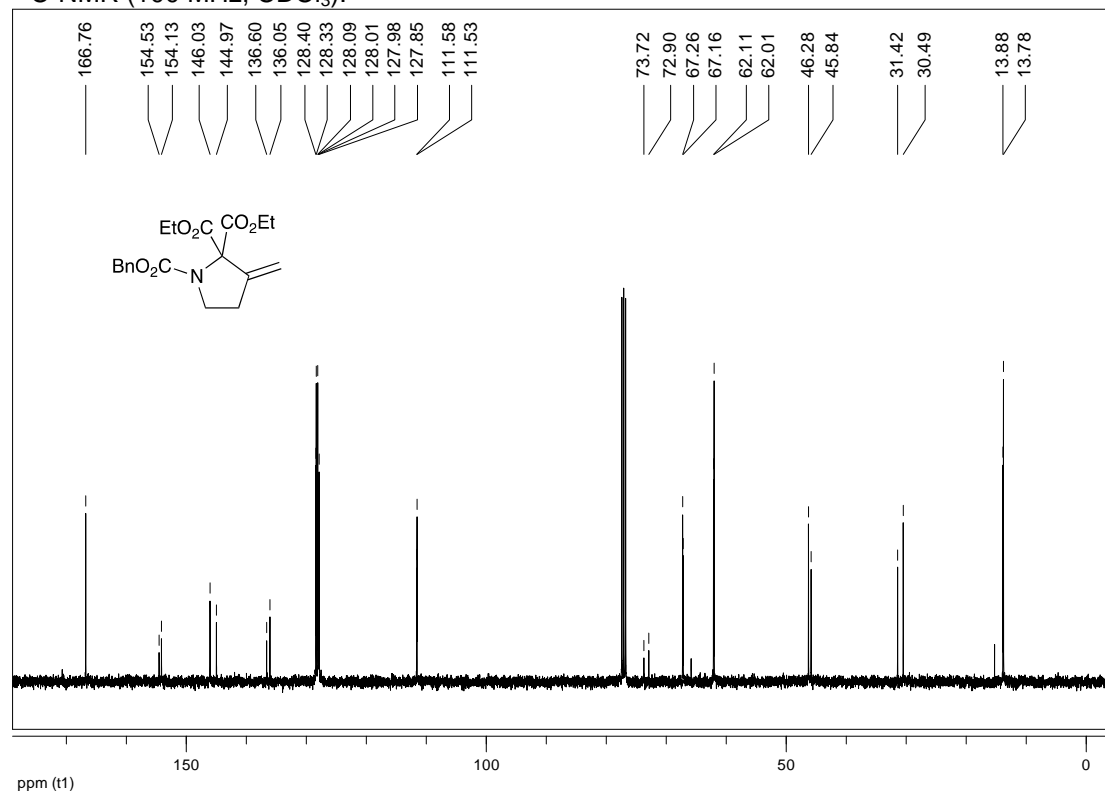

**2,2-Di-*tert*-butyl 1-ethyl 3-methylenepyrrolidine-1,2,2-tricarboxylate 16b – mixture of rotamers**

<sup>1</sup>H-NMR (400 MHz, CDCl<sub>3</sub>):

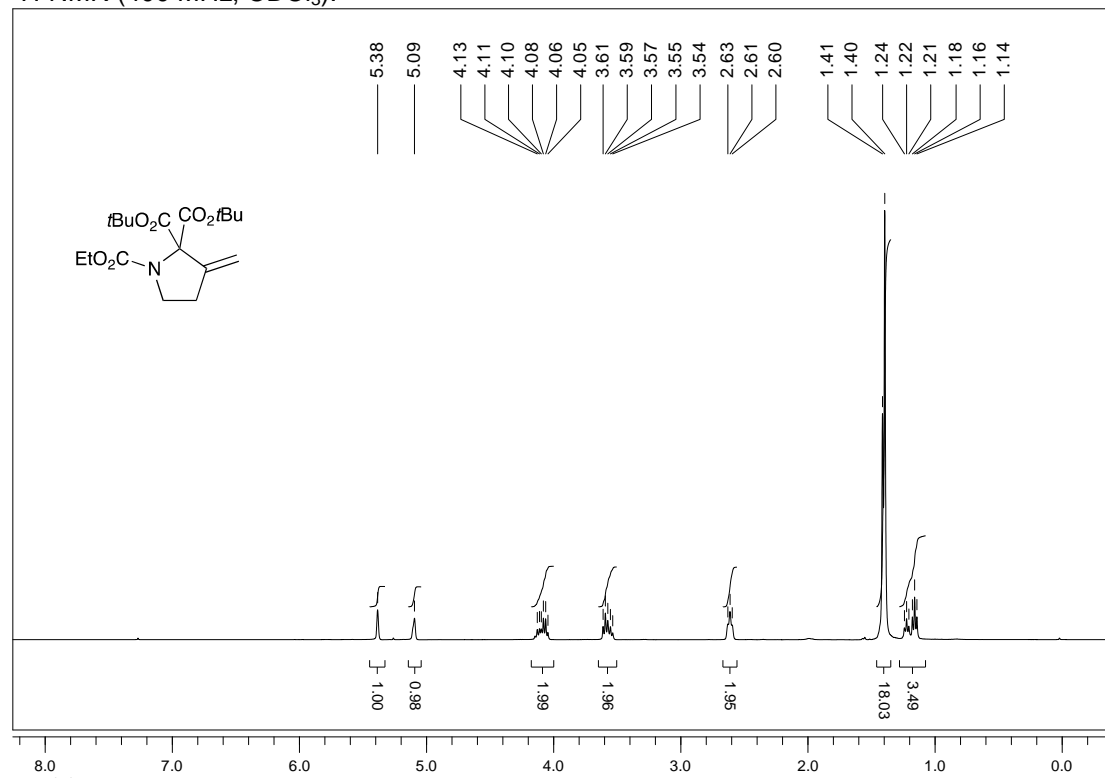

<sup>13</sup>C-NMR (100 MHz, CDCl<sub>3</sub>):

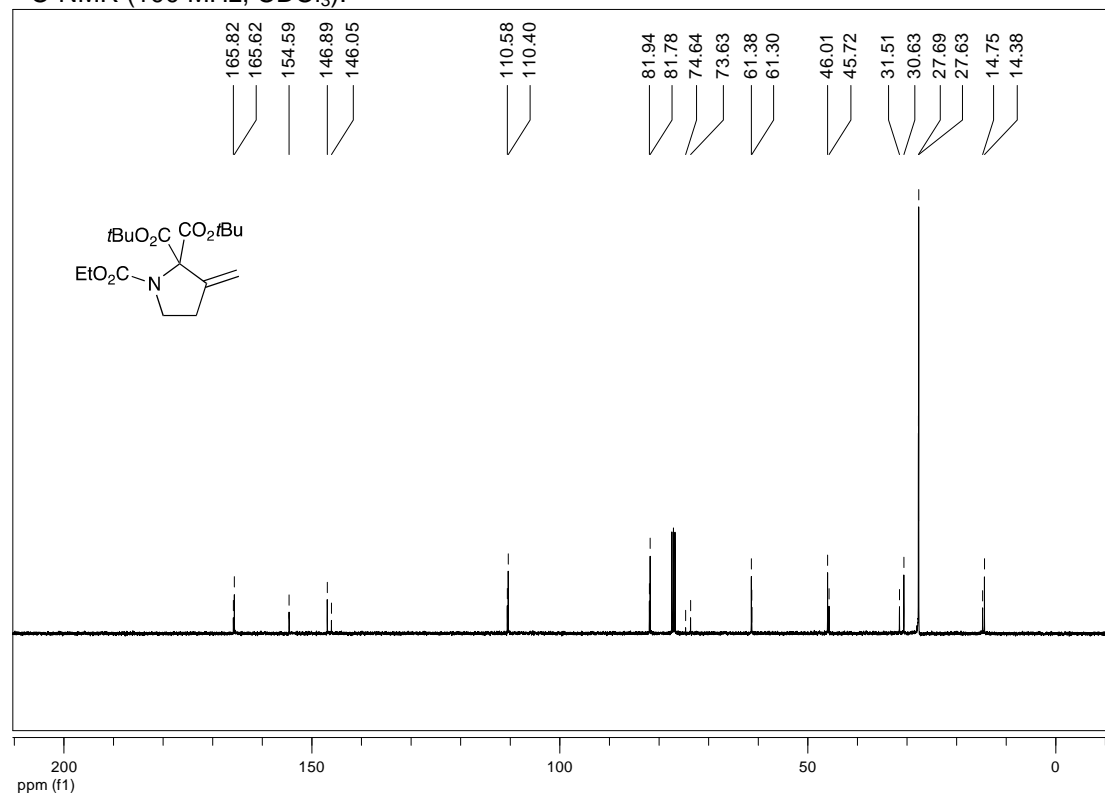

### Triethyl 3-pentylidenepyrrolidine-1,2,2-tricarboxylate 16c – mixture of diastereomers and rotamers

<sup>1</sup>H-NMR (400 MHz, CDCl<sub>3</sub>):

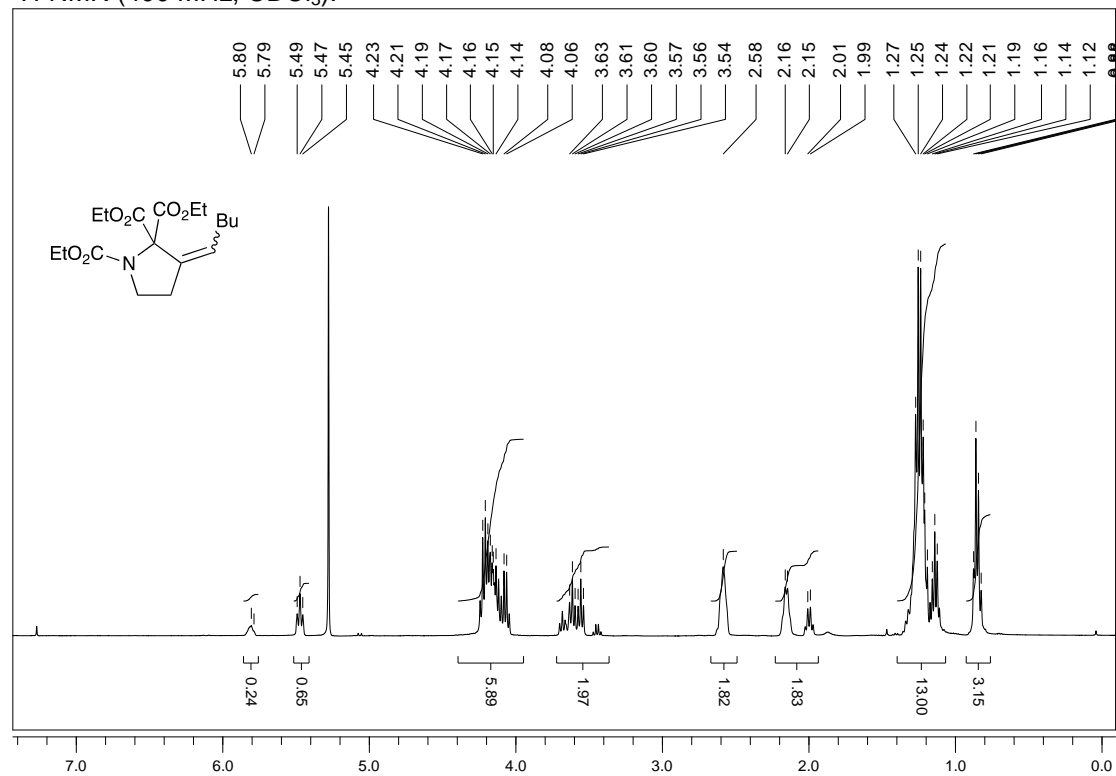

<sup>13</sup>C-NMR (100 MHz, CDCl<sub>3</sub>):

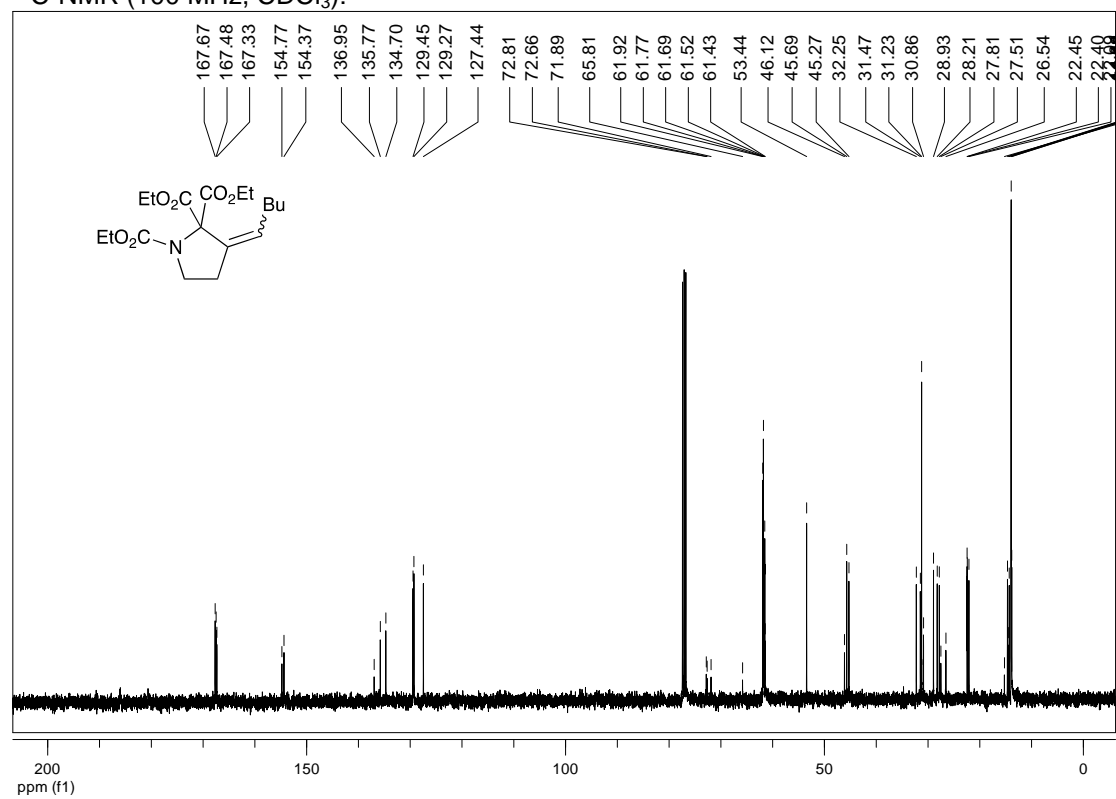

**Diethyl 1-benzyl-3-methylene-6-oxopiperidine-2,2-dicarboxylate 18a**

<sup>1</sup>H-NMR (400 MHz, CDCl<sub>3</sub>):

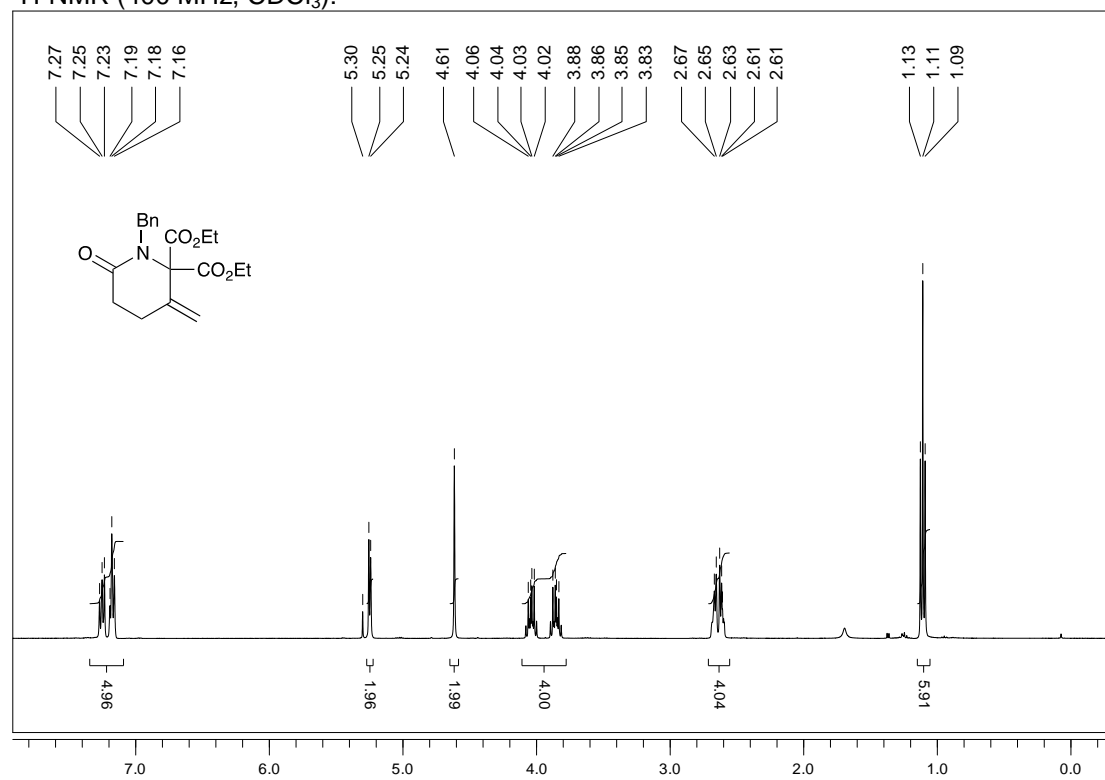

<sup>13</sup>C-NMR (100 MHz, CDCl<sub>3</sub>):

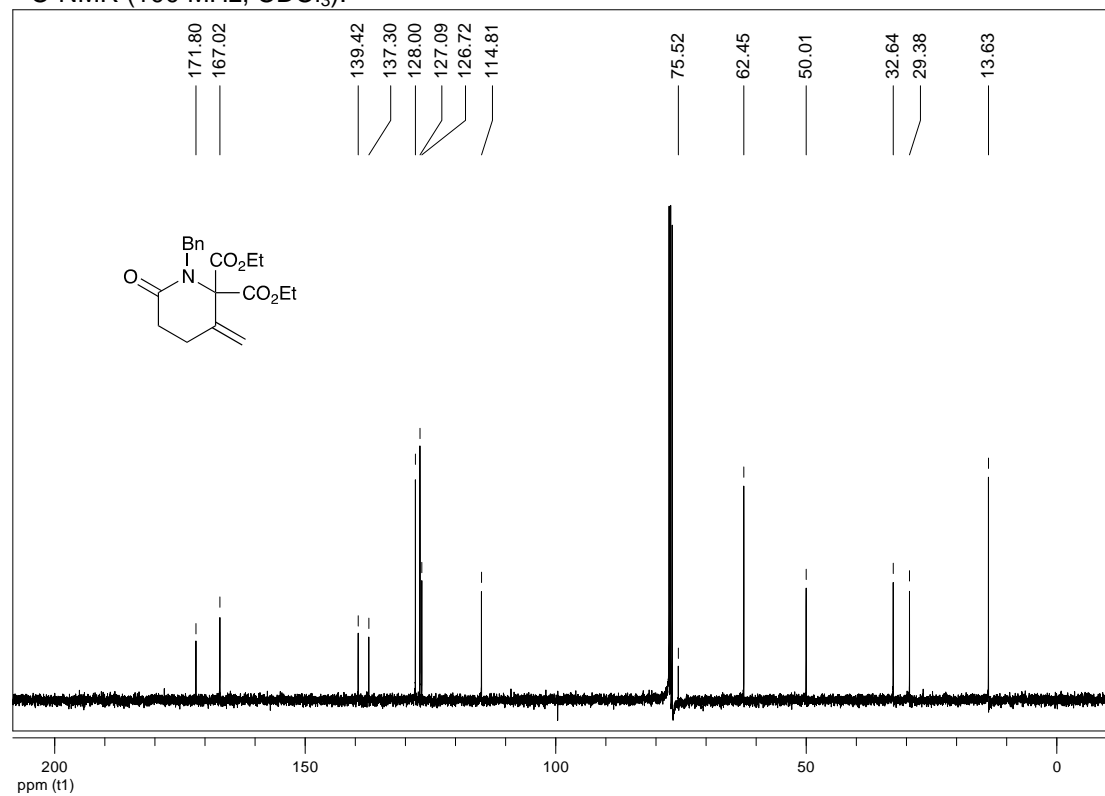

**Diethyl 1-benzyl-3-ethylidene-6-oxopiperidine-2,2-dicarboxylate 18b – 5:1 Z:E mixture of diastereomers**

<sup>1</sup>H-NMR (500 MHz, CDCl<sub>3</sub>):

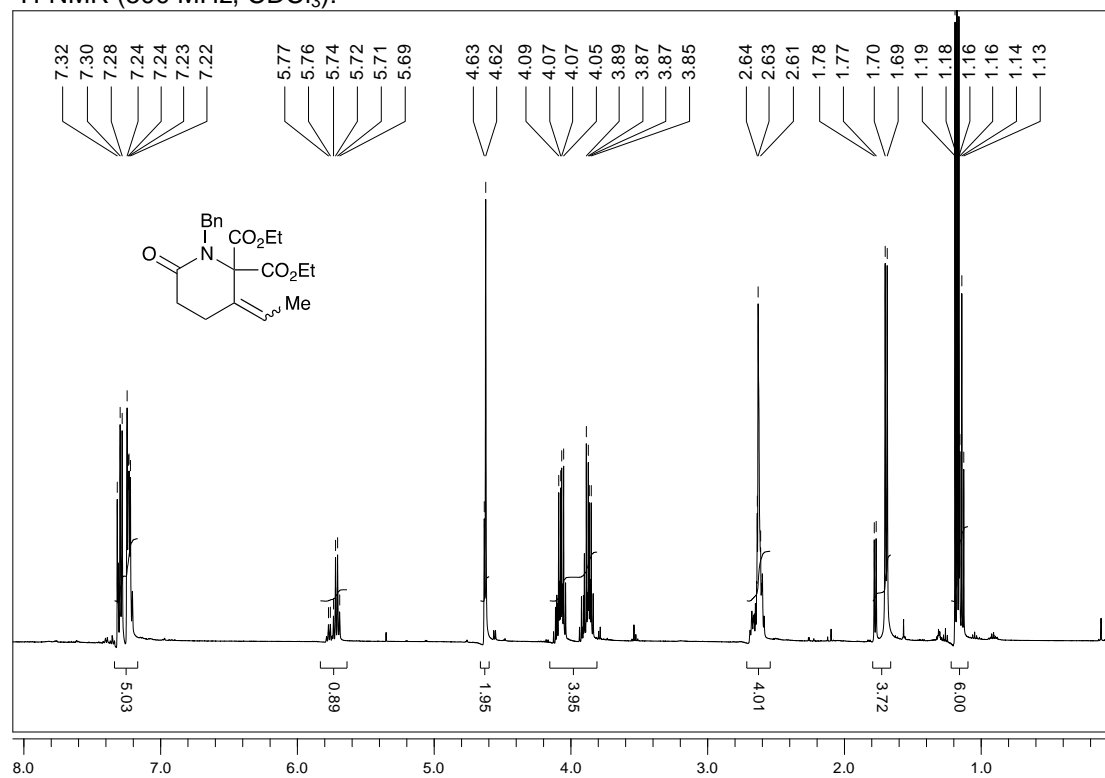

<sup>13</sup>C-NMR (125 MHz, CDCl<sub>3</sub>):

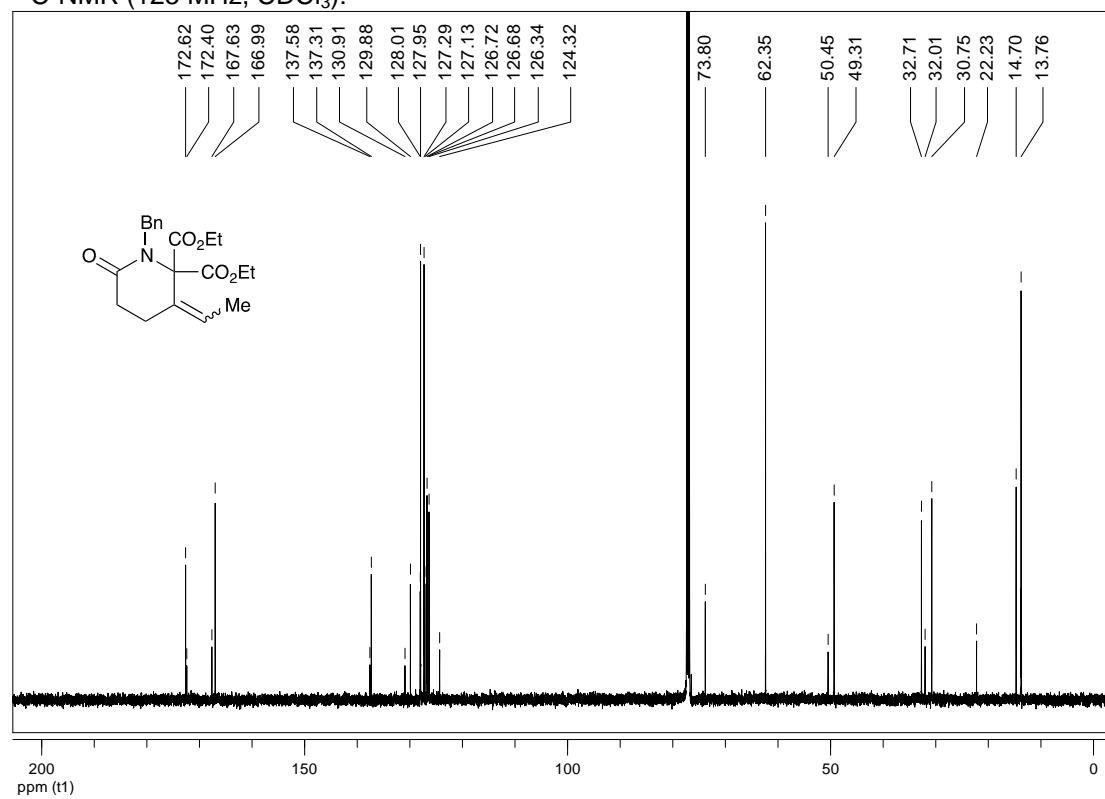

Supplement: c2cc32382f_2.pdf [file c2cc32382f_2.pdf]
